# Supplementary material for: MiR-212-3p functions as a tumor suppressor gene in group 3 medulloblastoma via targeting nuclear factor I/B (NFIB)
Source: PubMed Central journal article supplement (PMC8684142; doi:10.1186/s40478-021-01299-z), 2021-12-18

Additional File 2: Fig. S1

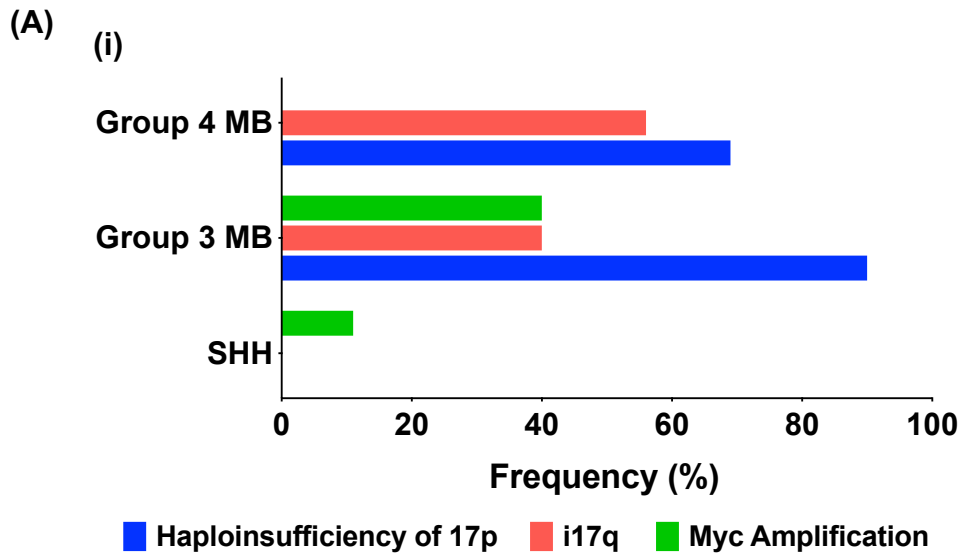

(ii)

|                                                      | Group 3 MB Tumors | Kanchan 2020 | Cavalli 2017 |
|------------------------------------------------------|-------------------|--------------|--------------|
| Haploinsufficiency of 17p (i17q, 17q gain, 17p loss) |                   | 90%          | N.R.         |
| i17q                                                 |                   | 40%          | 22%          |
| c-Myc amplification                                  |                   | 40%          | 17%          |
| Metastasis proximate to dx                           |                   | 30%          | 54%          |
| 5-year overall survival                              |                   | 40%          | 33%          |

(B)

| miR-212              | DNA methylation Status on miR-212 Promoter region |         |         |         |         |
|----------------------|---------------------------------------------------|---------|---------|---------|---------|
|                      | 1954986                                           | 1954175 | 1953842 | 1953837 | 1953823 |
| Chr 17 Location      |                                                   |         |         |         |         |
| Locus                | 1                                                 | 2       | 3       | 4       | 5       |
| Pediatric Cerebellum | 27                                                | 4       | 5       | 3       | 2       |
|                      | 5                                                 | 3       | 3       | 3       | 3       |
|                      | 30                                                | 3       | 5       | 2       | 3       |
|                      | 55                                                | 4       | 8       | 3       | 3       |
| GROUP 3 MB           | 45                                                | 10      | 28      | 10      | 11      |
|                      | 25                                                | 7       | 17      | 9       | 9       |
|                      | 74                                                | 6       | 13      | 5       | 6       |
|                      | 28                                                | 8       | 14      | 3       | 5       |
|                      | 24                                                | 6       | 8       | 3       | 5       |
|                      | 7                                                 | 5       | 4       | 2       | 2       |
| GROUP 4 MB           | 48                                                | 10      | 3       | 2       | 2       |
|                      | 8                                                 | 3       | 3       | 2       | 2       |
|                      | 16                                                | 4       | 4       | 3       | 3       |
|                      | 11                                                | 6       | 12      | 6       | 5       |
|                      | 74                                                | 12      | 30      | 11      | 11      |
|                      | 29                                                | 13      | 14      | 4       | 7       |
|                      | 17                                                | 7       | 6       | 2       | 4       |
|                      | 17                                                | 5       | 7       | 3       | 3       |
|                      | 7                                                 | 4       | 5       | 3       | 4       |
|                      | 24                                                | 6       | 8       | 3       | 5       |
| 30                   | 10                                                | 6       | 2       | 4       |         |

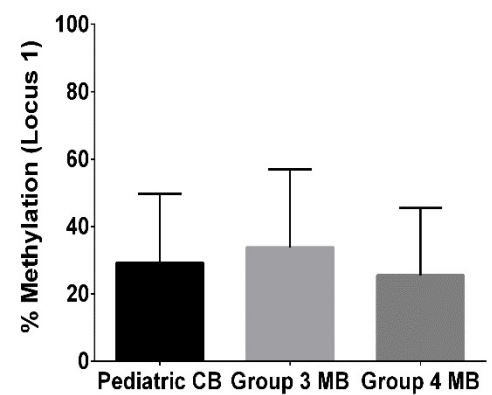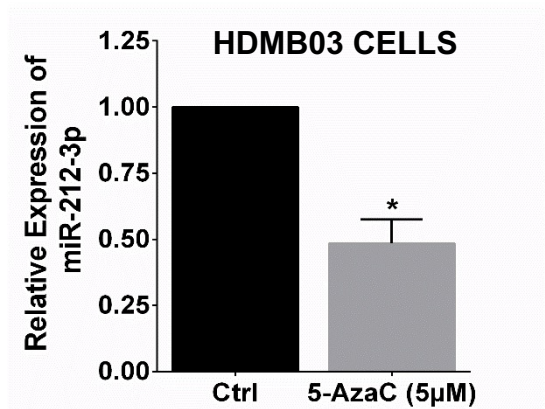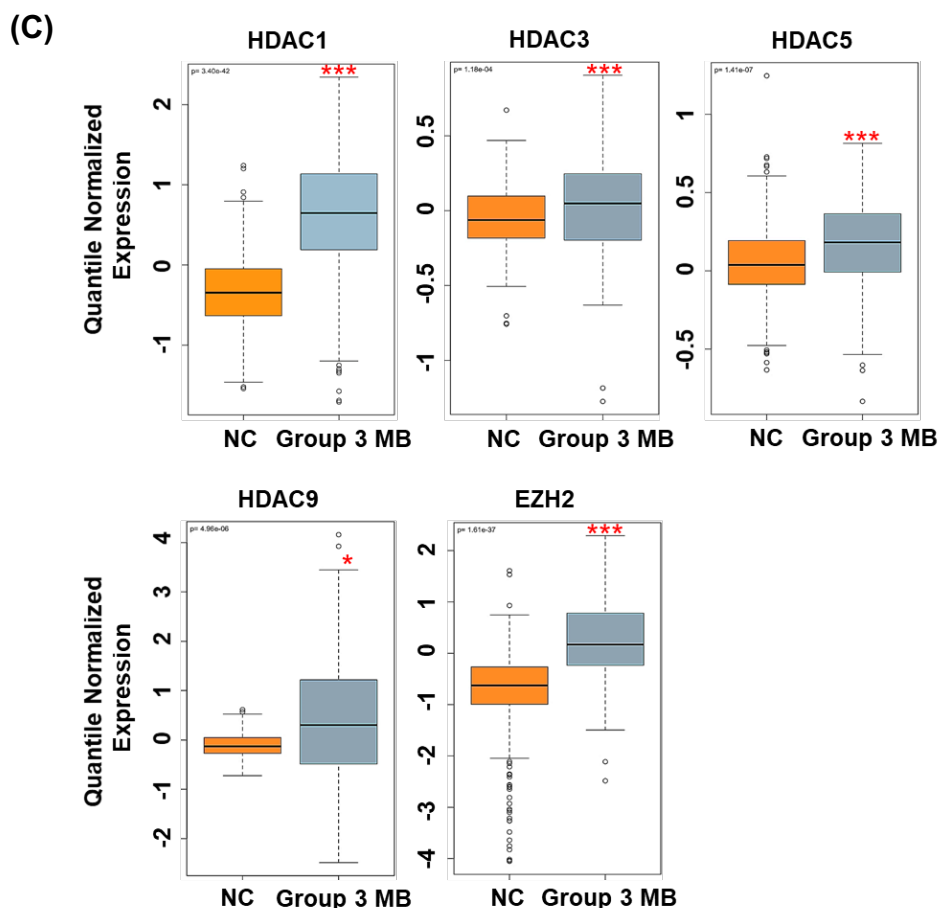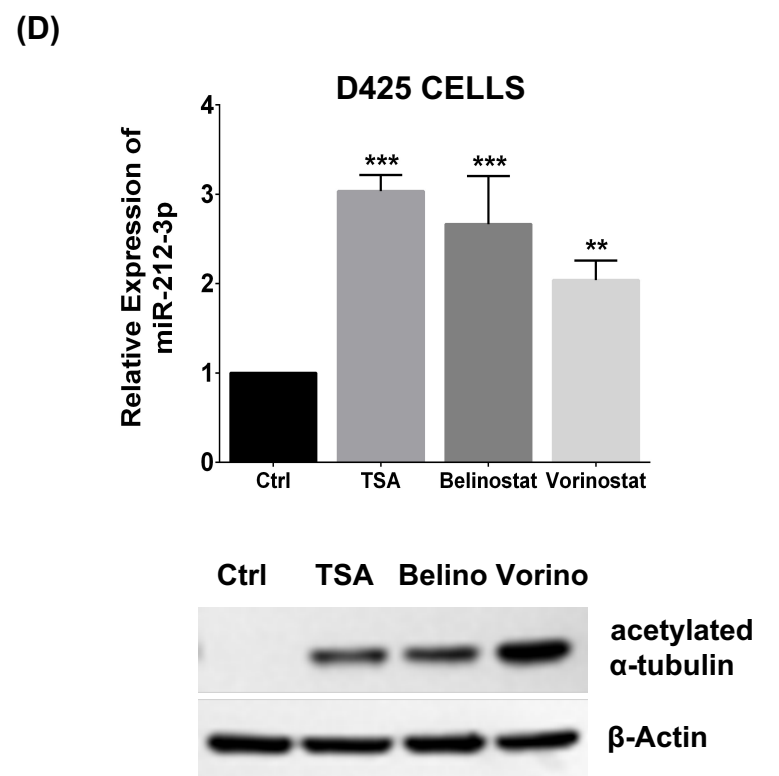

Supplement: 40478_2021_1299_MOESM2_ESM.pdf [file 40478_2021_1299_MOESM2_ESM.pdf]
