# Supplementary material for: MiR-212-3p functions as a tumor suppressor gene in group 3 medulloblastoma via targeting nuclear factor I/B (NFIB)
Source: PubMed Central journal article supplement (PMC8684142; doi:10.1186/s40478-021-01299-z), 2021-12-18
Supplement: 40478_2021_1299_MOESM1_ESM.pdf [file 40478_2021_1299_MOESM1_ESM.pdf]

## Additional File 1: Supplemental Methods

### Reagents:

| S. No | Antibody name                   | Manufacturer | Cat. No   |
|-------|---------------------------------|--------------|-----------|
| 1     | Cleaved caspase 3               | CST          | 9661      |
| 2     | Cleaved PARP                    | CST          | 9541      |
| 3     | Ki-67                           | abcam        | ab15580   |
| 4     | $\beta$ -actin                  | Sigma        | A1978     |
| 5     | NFIB                            | abcam        | ab186738  |
| 6     | NFIB (ChIP Assay)               | Sigma        | HPA003956 |
| 7     | H3K27me3 (ChIP Assay)           | abcam        | ab6002    |
| 8     | Acetylated $\alpha$ tubulin     | CST          | 5335      |
| 9     | H3K4me3 (ChIP Assay)            | abcam        | ab1012    |
| 10    | H3K9me2 (ChIP Assay)            | abcam        | ab1220    |
| 11    | H3K9Ac (ChIP Assay)             | abcam        | ab32129   |
| 12    | rabbit IgG control (ChIP Assay) | CST          | 2729      |
| 13    | c-Myc                           | abcam        | ab32072   |
| 14    | Ezh2                            | CST          | 5246      |
| 15    | Anti-c-Myc (Phospho Ser62)      | CST          | 13748     |
| 16    | Anti-c-Myc (phospho T58)        | abcam        | ab185655  |
