# Supplementary material for: MiR-212-3p functions as a tumor suppressor gene in group 3 medulloblastoma via targeting nuclear factor I/B (NFIB)
Source: PubMed Central journal article supplement (PMC8684142; doi:10.1186/s40478-021-01299-z), 2021-12-18

Additional File 3: Fig. S2

(A)

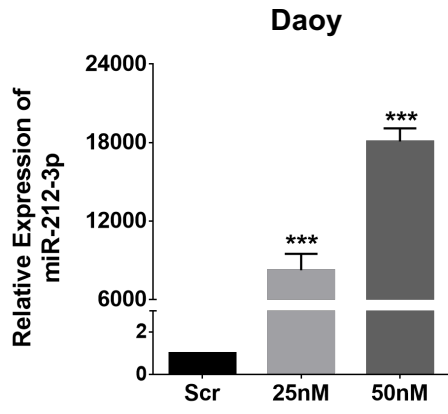

(B)

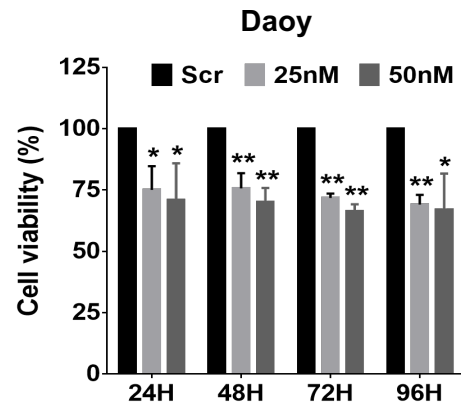

(C)

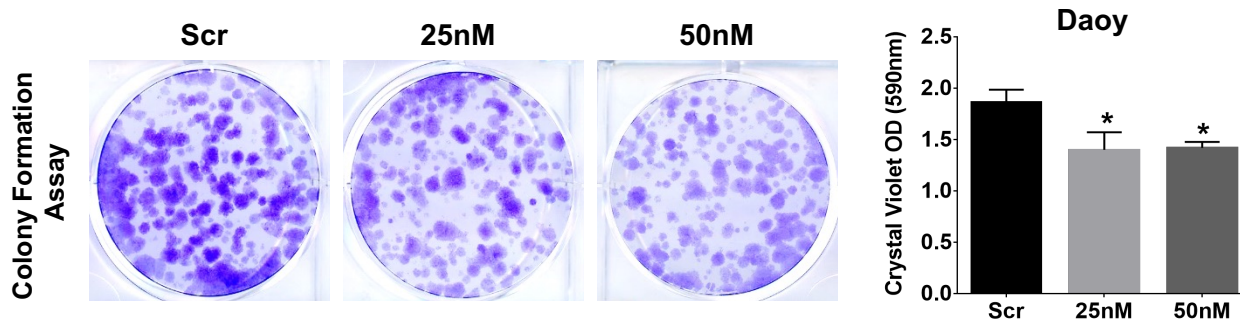

Supplement: 40478_2021_1299_MOESM3_ESM.pdf [file 40478_2021_1299_MOESM3_ESM.pdf]
