# Supplementary material for: MiR-212-3p functions as a tumor suppressor gene in group 3 medulloblastoma via targeting nuclear factor I/B (NFIB)
Source: PubMed Central journal article supplement (PMC8684142; doi:10.1186/s40478-021-01299-z), 2021-12-18
Supplement: 40478_2021_1299_MOESM4_ESM.pdf [file 40478_2021_1299_MOESM4_ESM.pdf]

Additional File 4: Fig. S3

(A)

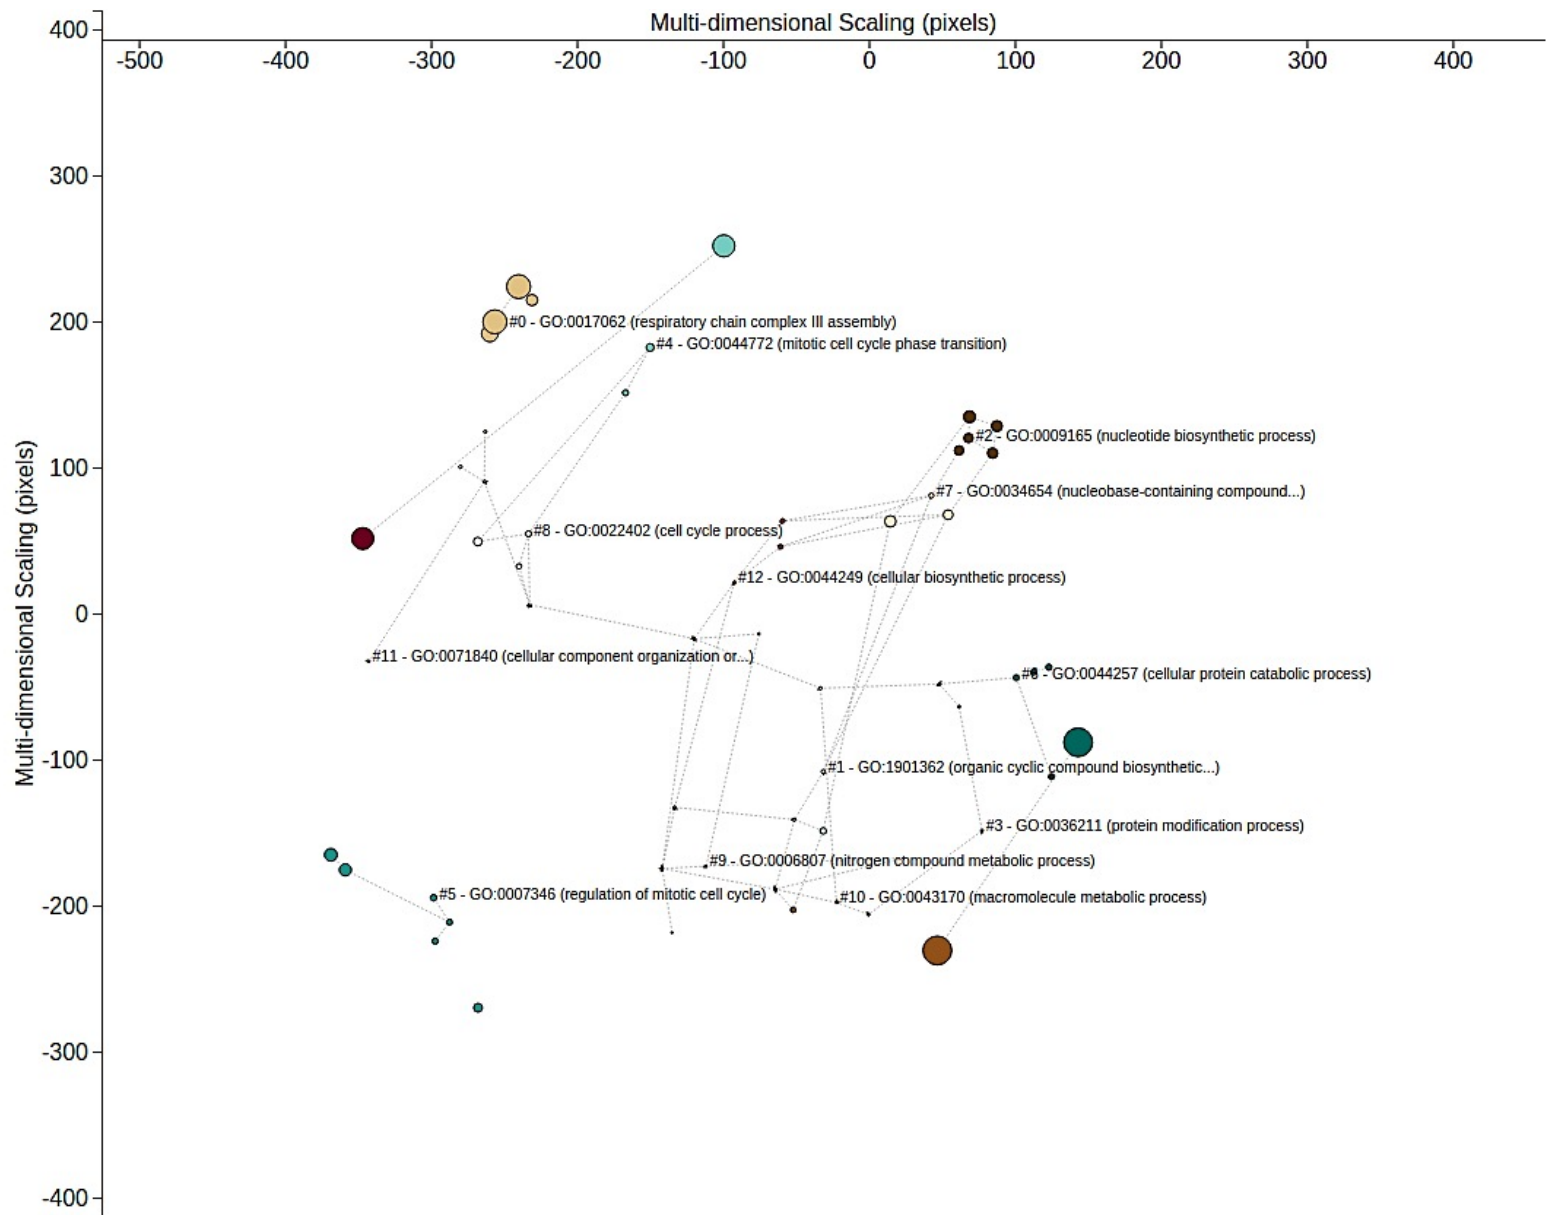

(B)

- regulation of mitotic cell cycle phase transition (GO:1901990)
- mitochondrial respiratory chain complex III assembly (GO:0034551)
- respiratory chain complex III assembly (GO:0017062)
- mitochondrial respiratory chain complex III biogenesis (GO:0097033)
- mitotic cell cycle phase transition (GO:0044772)
- cellular response to increased oxygen levels (GO:0036295)
- regulation of cyclin-dependent protein serine/threonine kinase activity (GO:0000079)
- positive regulation of cell cycle (GO:0045787)
- mitochondrial respiratory chain complex assembly (GO:0033108)
- regulation of histone deacetylase activity (GO:1901725)
