# Supplementary material for: MiR-212-3p functions as a tumor suppressor gene in group 3 medulloblastoma via targeting nuclear factor I/B (NFIB)
Source: PubMed Central journal article supplement (PMC8684142; doi:10.1186/s40478-021-01299-z), 2021-12-18
Supplement: 40478_2021_1299_MOESM7_ESM.pdf [file 40478_2021_1299_MOESM7_ESM.pdf]

Additional File 7: Table S2

| MiR-212-3p Targets | 3'-UTR Binding Sites, # (Target Scan) | Elevated Expression in Group 3 MB |                   | KM Survival Data (GSE85217)  |                                 |
|--------------------|---------------------------------------|-----------------------------------|-------------------|------------------------------|---------------------------------|
|                    |                                       | GSE148390 (n=10)                  | GSE124814 (n=233) | High Expressing patients (%) | High Expression = Poor Survival |
| CCDC71L            | 1                                     | x                                 | x                 | -                            |                                 |
| CTDSPL2            | 1                                     | x                                 | x                 | 97.2%                        |                                 |
| EDIL3              | 1                                     | x                                 | x                 | 62.09%                       | x                               |
| GIGYF1             | 1                                     | x                                 |                   | 82.67%                       |                                 |
| HSBP1              | 1                                     | x                                 | x                 | 73.69%                       |                                 |
| KDM5A              | 2                                     | x                                 | -                 | 1.30%                        | x                               |
| <b>NFIB</b>        | 2                                     | x                                 | x                 | 88.56%                       | x                               |
| NRCAM              | 1                                     | x                                 |                   | 19.93%                       |                                 |
| PSMA2              | 1                                     | x                                 | x                 | 1.30%                        | x                               |
| SDC2               | 1                                     | x                                 | x                 | 65.68%                       | x                               |
| SEPHS1             | 1                                     | x                                 | x                 | 3.75%                        | x                               |
| TAF4               | 2                                     | x                                 | x                 | 50.16%                       | x                               |
| TMEM43             | 1                                     | x                                 | x                 | 89.37%                       |                                 |
| USP9X              | 1                                     | x                                 |                   | 23.36%                       | x                               |
